# Supplementary material
Source: PubMed Central journal article supplement (PMC4303317)
Supplement: bi501088e_si_002.pdf [file bi501088e_si_002.pdf]

Supplemental Data

Figure 1.

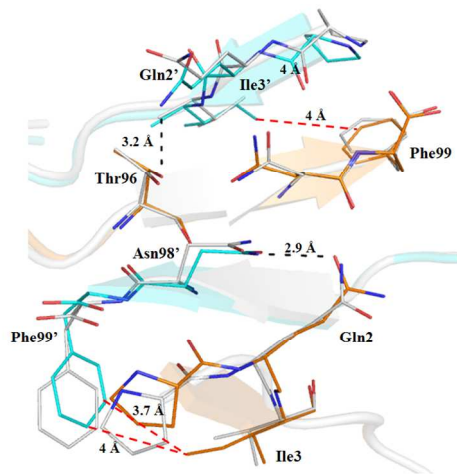

Figure 2.

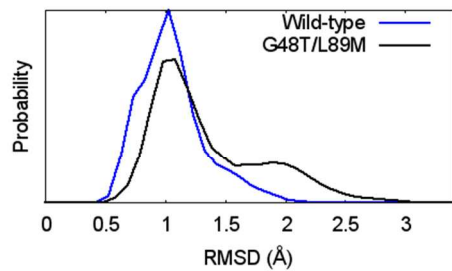

Figure 3.

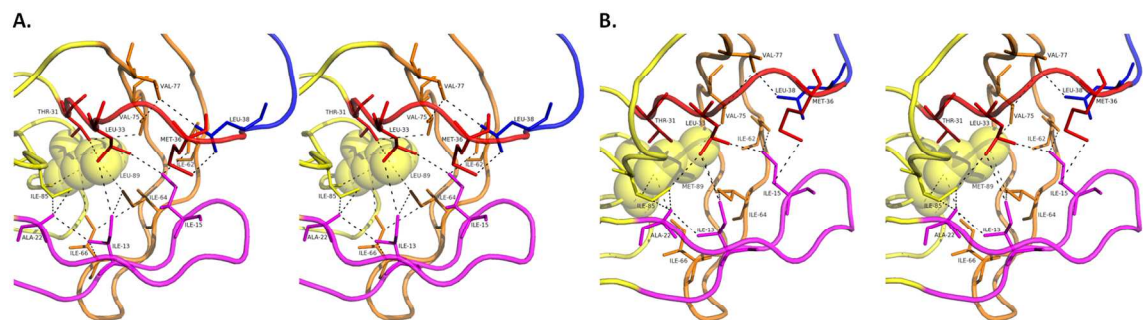

Figure 4.

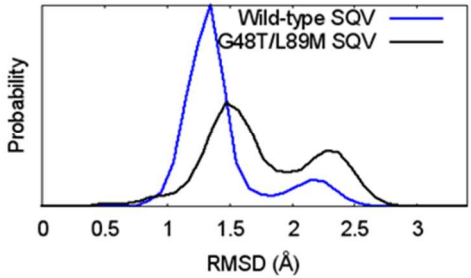

Figure 5.

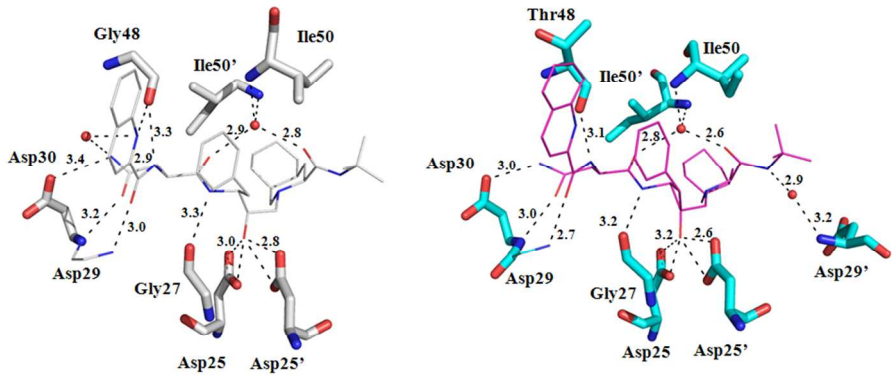

Figure 6.

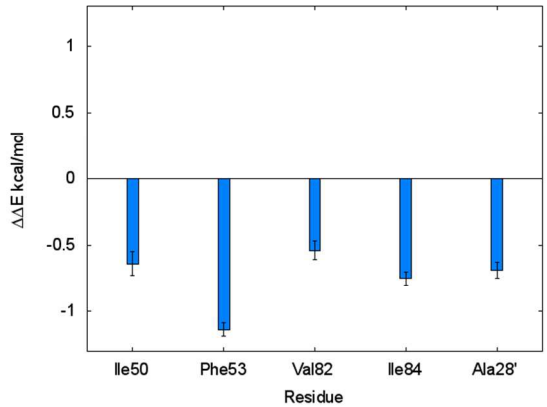

## Supplementary Figure Legends

**Figure 1.** PR<sub>WT-SQV</sub> is shown in silver and PR<sub>G48T/L89M-SQV</sub> is shown in orange (monomer A) and cyan (monomer B). A 180° rotation of the side chain of Gln2 and a 180° rotation of the side chain of Asn98' in PR<sub>G48T/L89M-SQV</sub> results in a new hydrogen bond (2.9 Å) between the O<sub>ε</sub> of Gln2 and the δN-H of Asn98'. A new hydrogen bond (3.2 Å) is also formed between the O<sub>ε</sub> of Gln2' and the O<sub>γ</sub>-H of Thr96. Two interdomain vdw contacts are gained between Ile3 and Phe99', as well as one new vdw contact between Ile3' and Phe99. These new interactions in the terminal domain contribute to a more stable dimer relative to PR<sub>WT-SQV</sub>.

**Figure 2.** A histogram of the root mean squared deviation of the flaps' Cα atoms (residues 43-58 of each monomer) obtained through the molecular dynamics simulations. PR<sub>G48T/L89M-SQV</sub> exhibits a decrease in peak intensity at 1 Å and an appearance of a peak at 2 Å compared to PR<sub>WT-SQV</sub>. These results suggest that the flaps of PR<sub>G48T/L89M-SQV</sub> are more open relative to PR<sub>WT-SQV</sub>.

**Figure 3.** Stereo images of hydrophobic core residues in monomer A of **A)** PR<sub>WT-SQV</sub> and **B)** PR<sub>G48T/L89M-SQV</sub>. PR is color coded to represent the fulcrum (magenta: 11-22), cantilever (orange: 58-78), elbow flap (blue: 39-57), and 30's strand (red). Vdw interactions are shown as black dashed lines. In PR<sub>WT-SQV</sub>, vdw interactions are amenable for hydrophobic sliding; however, in PR<sub>G48T/L89M-SQV</sub> a redistribution of vdw forces results in altered strand interactions and modified hydrophobic sliding.

**Figure 4.** A histogram of the root mean squared deviation of saquinavir. It compares the mobility of saquinavir in the active site of PR<sub>WT</sub> and PR<sub>G48T/L89M</sub> during the molecular dynamics simulations. The RMSD profile of saquinavir in PR<sub>G48T/L89M</sub> exhibits a marked decrease in peak intensity at ~1.3 Å and new peaks at higher RMSD values of 1.5 and ~2.3 Å compared to that of PR<sub>WT</sub> indicating that saquinavir is more mobile in the active site of PR<sub>G48T-L89M-SQV</sub>.

**Figure 5.** PR<sub>WT-SQV</sub> is shown in silver and PR<sub>G48T/L89M-SQV</sub> is shown in cyan and magenta. Hydrogen bonds are shown as dashed lines and distances are noted in Angstroms. The conserved water linking the PR flaps and saquinavir are present between the amide nitrogens of Ile50/50' and O1 and O3 of SQV in both structures. However, in the PR<sub>G48T/L89M-SQV</sub> complex the hydrogen bond from the carbonyl of Thre48 to N1 of the quinolone ring is missing.

**Figure 6.** A plot of a per-residue decomposition of the van der Waals energetics that only includes residues that interact with saquinavir. The differences between PR<sub>WT-SQV</sub> and PR<sub>G48T-L89M-SQV</sub> are shown where a negative number indicates that the van der Waals interaction with saquinavir is more favorable in PR<sub>WT-SQV</sub>. Only residues with differences greater than 0.5 kcal/mol were plotted.
